# Supplementary figures and images for: Mouse models of breast cancer metastasis
Source: Springer Nature journal article supplement (doi:10.1186/bcr1530), 2006-07-26

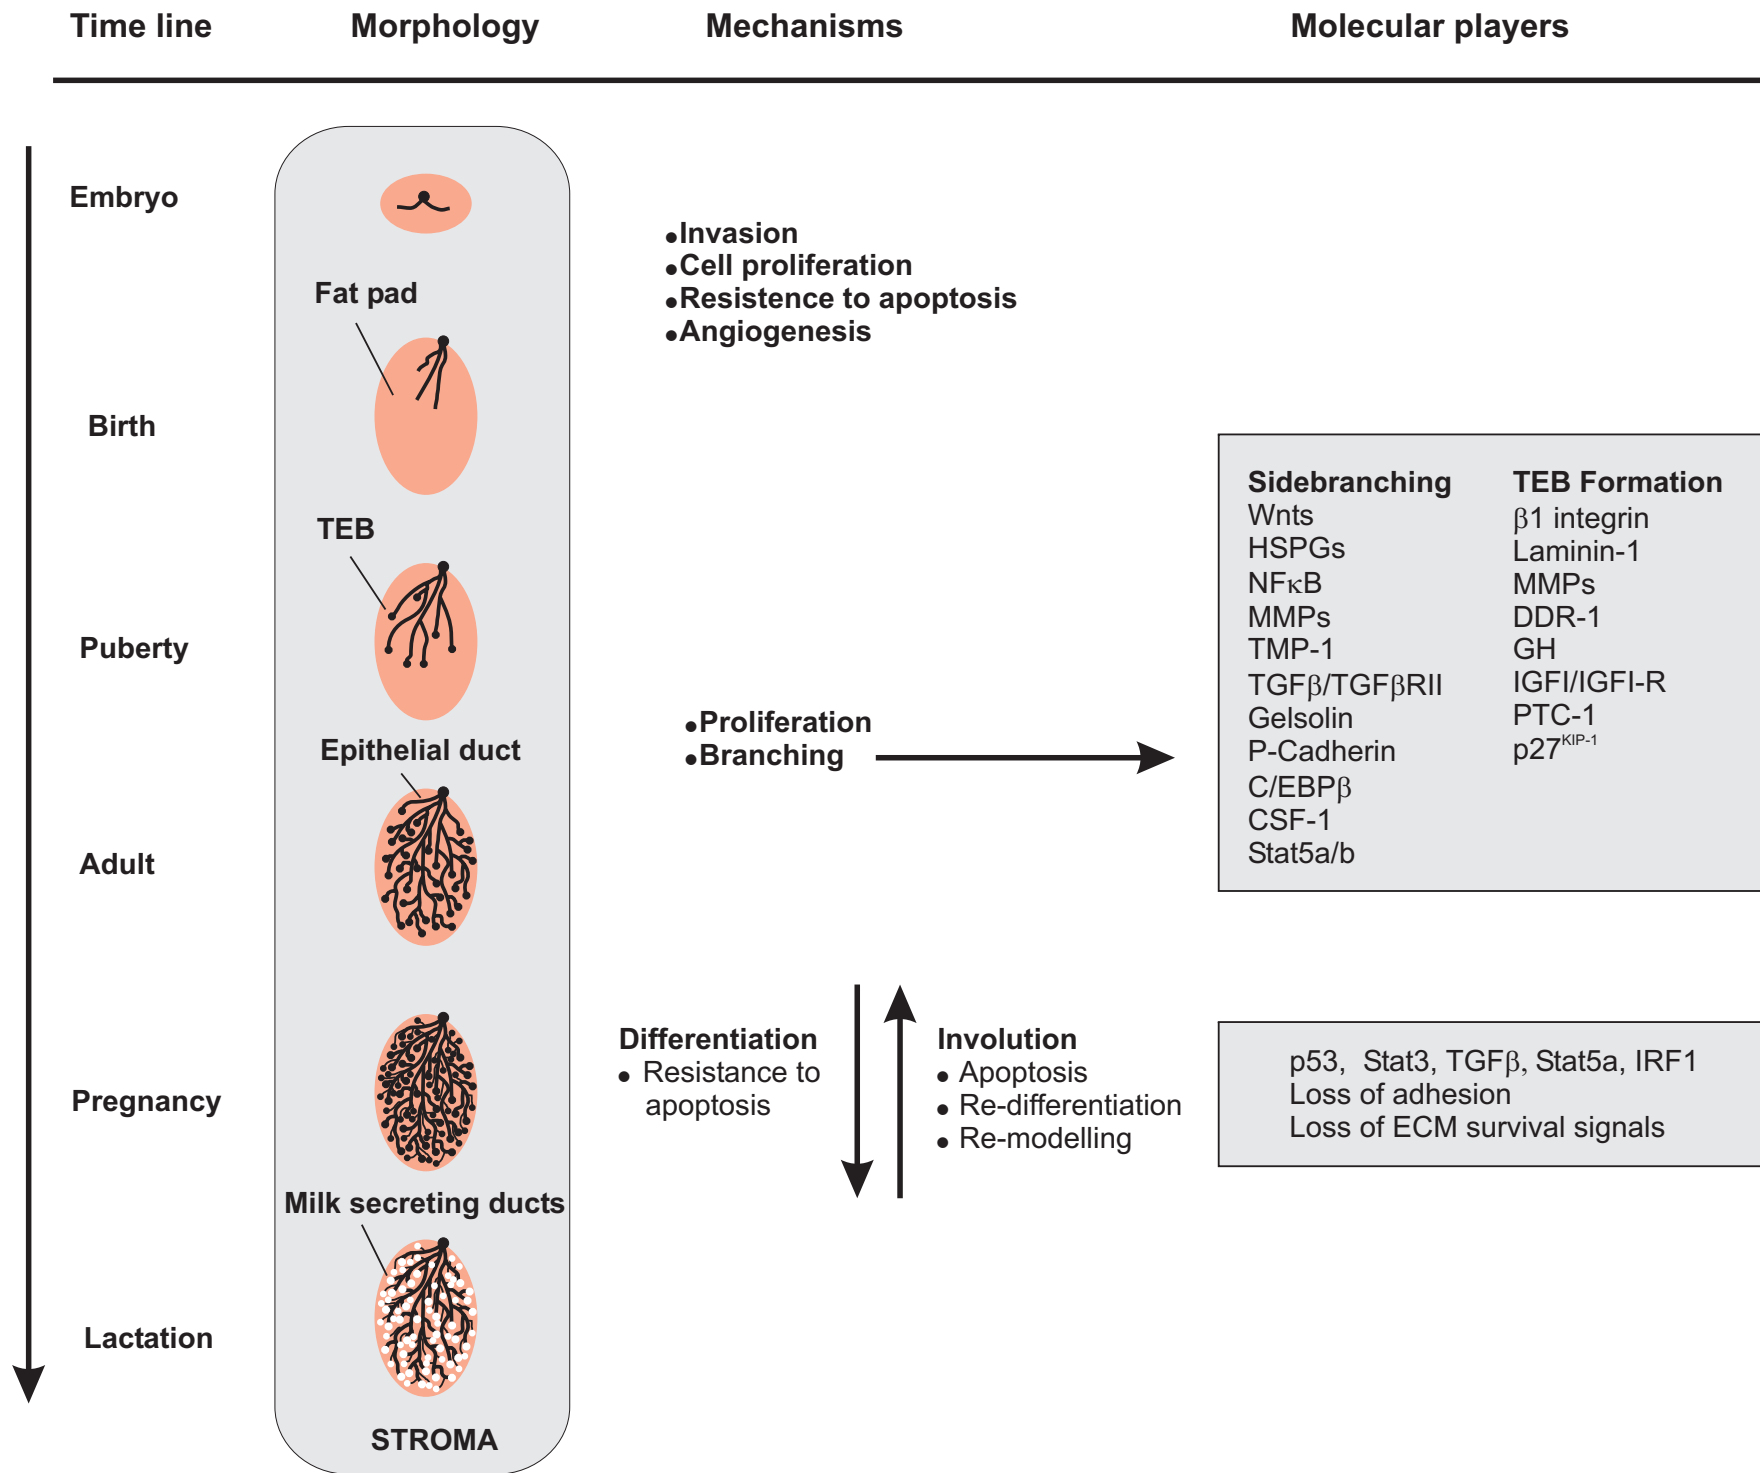

Supplement: 13058_2006_1498_MOESM1_ESM.pdf [file 13058_2006_1498_MOESM1_ESM.pdf]
